# Supplementary material for: Rapid detection of Vibrio parahaemolyticus using magnetic nanobead-based immunoseparation and quantum dot-based immunofluorescence
Source: Royal Society of Chemistry journal article supplement (doi:10.1039/d1ra07580b), 2021-01-01
Supplement: d1ra07580b1.pdf [file d1ra07580b1.pdf]

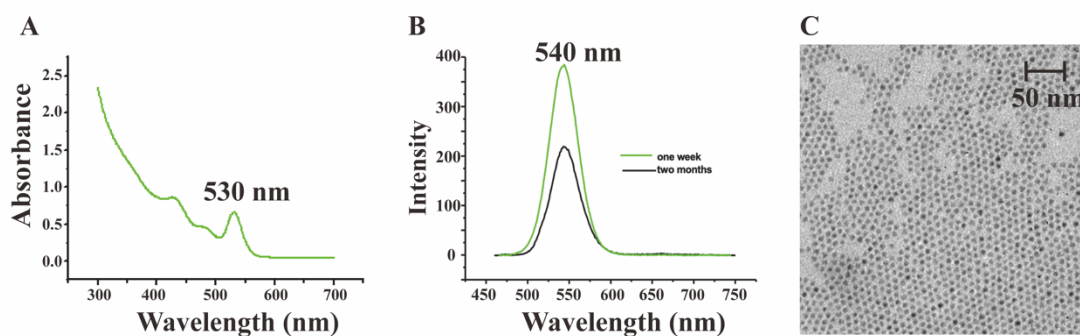

**Fig. S1** Characterization of QDs. (A) UV visible spectra. (B) Fluorescence spectra at one week and two months. (C) High-resolution TEM image.
